# Supplementary material
Source: PubMed Central journal article supplement (PMC6416450)
Supplement: supp_RA118.005870_140795_3_supp_261126_pkpyg4.pdf [file supp_RA118.005870_140795_3_supp_261126_pkpyg4.pdf]

Supplementary Figures and Tables

A new class of recombinant human albumin with multiple surface thiols exhibit stable conjugation, and enhanced FcRn binding and blood circulatory half-life

**Karen Kræmmer Schelde<sup>1§</sup>, Karl Nicholls<sup>2§</sup>, Frederik Dagnæs-Hansen<sup>3</sup>, Karen Bunting<sup>2</sup>, Helen Rawsthorne<sup>2</sup>, Birgitte Andersen<sup>4</sup>, Christopher J. A. Finnis<sup>2</sup>, Miranda Williamson<sup>2</sup>, Jason Cameron<sup>2</sup>, Kenneth A. Howard<sup>1\*</sup>.**

<sup>1</sup>Interdisciplinary Nanoscience Center (iNANO), Department of Molecular Biology and Genetics, Aarhus University, 8000 Aarhus C, Denmark. <sup>2</sup>Albumedix Ltd, Nottingham, NG7 1FD, United Kingdom.

<sup>3</sup>Department of Biomedicine, Aarhus University, 8000 Aarhus C, Denmark. <sup>4</sup>Novozymes A/S, Kroghøjvej 36, 2880 Bagsværd, Denmark.

Running title: *Engineered albumin with enhanced drug-carrier potential*

\*Corresponding author: Kenneth A. Howard. Interdisciplinary Nanoscience Centre (iNANO), Department of Molecular Biology and Genetics, Aarhus University, 8000 Aarhus C, Denmark. Phone: (45) 87155831; E-mail: kenh@inano.au.dk

**Keywords:** Albumin, protein engineering, site-directed mutagenesis, Fc-receptor, multidrug transporter, multifunctional protein, cysteine-mediated cross-linking, pharmacokinetics, drug delivery.

---

Supplementary Table 1. List of primers used in the generation of single-thiol variants. All variants are with a C34A background.

| Variant | Forward Primer<br>5'-3'                                                  | Reverse Primer<br>5'-3'              |
|---------|--------------------------------------------------------------------------|--------------------------------------|
| L24C    | GAAGAAAACCTCAAGGCTTTGGTCTGTATCGCTTTC<br>GCTCAATACTTGCA                   | GACCAAAGCCTTGAAGTTTTCTTCACCCAAGTCCT  |
| F49C    | AGTTGGTCAACGAAGTTACCGAATGTGCTAAGACTT<br>GTGTTGCTGACG                     | TTCGGTAACTTCGTTGACCAACTTGACGTGATCTT  |
| V54C    | GTTACCGAATTCGCTAAGACTTGTGTGCTGACGAA<br>TCCGCGGAAAAAC                     | ACAAGTCTTAGCGAATTCGGTAACTTCGTTGACCAA |
| D56C    | GAATTCGCTAAGACTTGTGTGCTTGTGAATCCGCG<br>GAAAACGTGACA                      | AGCAACACAAGTCTTAGCGAATTCGGTAACTTCGTT |
| L66C    | CGCGGAAAACCTGTGACAAGTCCTGTCACACCTTGTT<br>CGGTGATAAGTT                    | GGACTTGTACAGTTTTCCGCGGATTCGTCAGC     |
| A92C    | CGGTGAAATGGCTGACTGTTGTTGTAAGCAAGAACC<br>AGAAAGAAACGAA                    | ACAACAGTCAGCCATTTACCCTAGGTTTTCTCTC   |
| K93C    | GTGAAATGGCTGACTGTTGTGCTTGTCAAGAACCAG<br>AAAGAAACGAATGT                   | AGCACAACAGTCAGCCATTTACCCTAGGTTTTCTC  |
| Q94C    | AAATGGCTGACTGTTGTGCTAAGTGTGAACCAGAAA<br>GAAACGAATGTTTC                   | CTTAGCACAACAGTCAGCCATTTACCCTAGGTT    |
| E97C    | ACTGTTGTGCTAAGCAAGAACCATGTAGAAACGAAT<br>GTTTTCTGCAACAC                   | TGGTTCCTGCTTAGCACAACAGTCAGCCATTTAC   |
| H128C   | TTGACGTCATGTGTACTGCTTTCTGTGACAACGAAG<br>AAACCTTCTTGAAG                   | GAAAGCAGTACACATGACGTCAACTTCTGGTCTAA  |
| F156C   | ACTTCTACGCTCCAGAATTGTTGTGTTTCGCTAAGA<br>GATACAAGGCTGC                    | CAACAATTCTGGAGCGTAGAAGTATGGGTGTCTTC  |
| A226C   | AGATTGTCTCAAAGATTCCCAAAGTGTGAATTCGCT<br>GAAGTTTCTAAGTTG                  | CTTTGGGAATCTTTGAGACAATCTAGCGACAGCC   |
| E227C   | TGTCTCAAAGATTCCCAAAGCTTGTTCGCTGAAG<br>TTTCTAAGTTGGTT                     | AGCCTTTGGGAATCTTTGAGACAATCTAGCGACAG  |
| E230C   | GATTCCAAAGGCTGAATTCGCTTGTGTTTCTAAGTT<br>GGTACTGACTTG                     | AGCGAATTCAGCCTTTGGGAATCTTTGAGACAATCT |
| D237C   | GCTGAAGTTTCTAAGTTGTTACTTGTGTTGACTAAG<br>GTTACACTGAATGT                   | AGTAACCAACTTAGAACTTCAGCGAATTCAGCCTT  |
| K240C   | TCTAAGTTGGTTACTGACTTGACTTGTGTTTCACTG<br>AATGTTGTCACGG                    | AGTCAAGTCAGTAACCAACTTAGAACTTCAGCGAA  |
| D259C   | GGAATGTGCTGATGACAGAGCTTGTGTTGGCTAAGTA<br>CATCTGTGAAAAC                   | AGCTCTGTCATCAGCACATTCCAACAAGTCACCG   |
| K262C   | TGATGACAGAGCTGACTTGGCTTGTACATCTGTGA<br>AAACCAAGACTCT                     | AGCCAAGTCAGCTCTGTCATCAGCACATTCCAAC   |
| N267C   | GACTTGGCTAAGTACATCTGTGAATGTCAAGACTCT<br>ATCTCTTCCAAGTTG                  | TTCACAGATGTACTTAGCCAAGTCAGCTCTGTCATC |
| Q268C   | TTGGCTAAGTACATCTGTGAAAACCTGTGACTCTATC<br>TCTTCCAAGTTGAAG                 | GTTTTACAGATGTACTTAGCCAAGTCAGCTCTGT   |
| I271C   | TACATCTGTGAAAACCAAGACTCTTGTCTTCCAAG<br>TTGAAGGAATGTTGT                   | AGAGTCTTGGTTTTTACAGATGTACTTAGCCAAGTC |
| L275C   | ACCAAGACTCTATCTTCCAAGTGAAGGAATGTT<br>CTTGAAGAGATAGAGTCTTGGTTTTTACAGATGTA | CTTGAAGAGATAGAGTCTTGGTTTTTACAGATGTA  |

*Engineered albumin with enhanced drug-carrier potential*

|       |                                                          |                                             |
|-------|----------------------------------------------------------|---------------------------------------------|
|       | GTGAAAAGCCATTG                                           |                                             |
| E277C | GACTCTATCTCTTCCAAGTTGAAGTGTGTTGTGAA<br>AAGCCATTGTTGGAA   | CTTCAACTTGAAGAGATAGAGTCTTGGTTTTCACAG        |
| L284C | AAGGAATGTTGTGAAAAGCCATTGTGTGAAAAGTCT<br>CACTGTATTGCTGAA  | CAATGGCTTTTCACAACATTCTTCAACTTGGGAAGA        |
| E294C | AAGTCTCACTGTATTGCTGAAGTTTGTAAACGATGAA<br>ATGCCAGCTGACTT  | AACTTCAGCAATACAGTGAGACTTTTCCAACAATGG        |
| E311C | CATCTTTGGCTGCTGACTTTCGTTTGTCTAAGGACGT<br>TTGTAAGAACTAC   | AACGAAGTCAGCAGCCAAAGATGGCAAGTCAGCT          |
| K317C | GACGTTTGTAAAGAACTACGCTGAATGTAAGGACGTC<br>TTCTTGGGTATGTT  | ACAAACGTCCTTAGATTCAACGAAGTCAGCAGCC          |
| A322C | GTCTTCTTGGGTATGTTCTTGTACTGTTACGCTAGAA<br>GACACCCAGACT    | TTCAGCGTAGTTCCTTACAAACGTCCTTAGATTCAACG      |
| E333C | CGAATACGCTAGAAGACACCCATGTTACTCCGTTGT<br>CTTGTGTTGAG      | GTACAAGAACATACCCAAGAAGACGTCCTTAGCTTC        |
| D340C | TGTTGAGATTGGCTAAGACCTACTGTACTACCCTCG<br>AGAAGTGTGTTG     | TGGGTGCTTCTAGCGTATTCGTACAAGAACATAC          |
| E354C | GACCTACGAAACTACCCTCGAGTGTGTTGTGCTGC<br>TGCTGACCCA        | GTAGGTCTTAGCCAATCTCAACAACAAGACAACGG         |
| E358C | AAACTACCCTCGAGAAGTGTGTTGTGCTGCTGACC<br>CACACGAATGT       | GAGGGTAGTTTCGTAGGTCTTAGCCAATCTCAACA         |
| K359C | TCGATGAATTCAAGCCATTGGTCTGTGAACCACAAA<br>ACTTGATCAAGCAA   | CTCGAGGGTAGTTTCGTAGGTCTTAGCCAATCTC          |
| A362C | GCAAAACTGTGAATTGTTTCGAACAATGTGGTGAATA<br>CAAGTTCCAAAACGC | ACAACACTTCTCGAGGGTAGTTTCGTAGGTCTTAG         |
| E382C | GTTACCGAATTCGCTAAGACTTGTGTTGTGCTGACGAA<br>TCCGCGGAAAAC   | GACCAATGGCTTGAATTCATCGAAAACCTTAGCGT         |
| L398C | GAATTCGCTAAGACTTGTGTTGCTTGTGAATCCGCG<br>GAAAACCTGTGACA   | TTGTTGGAACAATTCACAGTTTTGCTTGATCAAGTTT<br>TG |

Supplementary Table 2. Free thiol profile detection by DTNB addition (+197±15 Da increase in mass) of the new mutations in the thiol variants. Predicted molecular mass post DTNB treatment for conjugation efficiency measurements using MS spectra. Difference shows actual measured mass minus theoretical mass (Da). All variants are with a C34A background.

| Variant | Theoretical Mass | Mass After DTNB Treatment |                 |            |
|---------|------------------|---------------------------|-----------------|------------|
|         |                  | Theoretical               | Actual Measured | Difference |
| L24C    | 66397            | 66594                     | 66599           | 5          |
| F49C    | 66363            | 66560                     | 66568           | 8          |
| V54C    | 66411            | 66608                     | 66613           | 5          |
| D56C    | 66395            | 66592                     | 66600           | 8          |
| L66C    | 66397            | 66594                     | 66599           | 5          |
| A92C    | 66439            | 66636                     | 66641           | 5          |
| K93C    | 66382            | 66579                     | 66588           | 9          |
| Q94C    | 66382            | 66579                     | 66581           | 2          |
| E97C    | 66381            | 66578                     | 66580           | 2          |
| H128C   | 66373            | 66570                     | 66572           | 2          |
| F156C   | 66363            | 66560                     | 66564           | 4          |
| A226C   | 66439            | 66636                     | 66637           | 1          |
| E227C   | 66381            | 66578                     | 66584           | 6          |
| E230C   | 66381            | 66578                     | 66582           | 4          |
| D237C   | 66395            | 66592                     | 66593           | 1          |
| K240C   | 66382            | 66579                     | 66584           | 5          |
| D259C   | 66395            | 66592                     | 66594           | 2          |
| K262C   | 66382            | 66579                     | 66584           | 5          |
| N267C   | 66396            | 66593                     | 66592           | -1         |
| Q268C   | 66382            | 66579                     | 66584           | 5          |
| I271C   | 66397            | 66594                     | 66596           | 2          |
| L275C   | 66397            | 66594                     | 66597           | 3          |
| E277C   | 66381            | 66578                     | 66583           | 5          |
| L284C   | 66397            | 66594                     | 66592           | -2         |
| E294C   | 66381            | 66578                     | 66581           | 3          |
| E311C   | 66381            | 66578                     | 66589           | 11         |
| K317C   | 66382            | 66579                     | 66582           | 3          |
| A322C   | 66439            | 66636                     | 66640           | 4          |
| E333C   | 66381            | 66578                     | 66582           | 4          |
| D340C   | 66395            | 66592                     | 66602           | 10         |
| E354C   | 66381            | 66578                     | 66583           | 5          |
| E358C   | 66381            | 66578                     | 66583           | 5          |
| K359C   | 66382            | 66579                     | 66583           | 4          |
| A362C   | 66439            | 66636                     | 66641           | 5          |

| <b>Variant</b> | <b>Theoretical Mass</b> | <b>Mass After DTNB Treatment</b> |                        |                   |
|----------------|-------------------------|----------------------------------|------------------------|-------------------|
|                |                         | <b>Theoretical</b>               | <b>Actual Measured</b> | <b>Difference</b> |
| E382C          | 66381                   | 66578                            | 66586                  | 8                 |
| L398C          | 66397                   | 66594                            | 66597                  | 3                 |

Supplementary Table 3. GP-HPLC aggregation detection of the monomer stability of rHSA thiol variants over 6 months at 2-8°C. Bracketed values relative to WT rHSA control. ND: not determined.

| Sample     | GPHPLC<br>Conc.<br>(mg/mL) | % Monomer |          |           | Δ% Monomer |            |
|------------|----------------------------|-----------|----------|-----------|------------|------------|
|            |                            | T=0       | T=7 week | T=6 month | 0-7 week   | 0-6 months |
| WT rHSA    | 1.1                        | 87 (100)  | 88 (100) | 89 (100)  | 1          | 2          |
| C34A+K93C  | 0.7                        | 91 (105)  | 92 (105) | 92 (103)  | 1          | 1          |
| C34A+A226C | 1.1                        | 93 (107)  | 93 (106) | 93 (105)  | 0          | 0          |
| C34A+E230C | 0.6                        | 90 (103)  | 91 (103) | ND (ND)   | 1          | ND         |
| C34A+I271C | 1.2                        | 91 (105)  | 91 (103) | 91 (102)  | 0          | 0          |
| C34A+E294C | 0.9                        | 96 (110)  | 96 (109) | 96 (108)  | 0          | 0          |
| C34A+E358C | 1.0                        | 89 (102)  | 83 (94)  | 80 (90)   | -6         | -9         |

Supplementary Table 4. UHPLC aggregation detection of the monomer stability of rHSA thiol variants over 4 months at 2-8°C. Bracketed values relative to WT rHSA control.

| Sample     | UHPLC conc.<br>(mg/mL) | % Monomer |          |           | Δ% Monomer |            |
|------------|------------------------|-----------|----------|-----------|------------|------------|
|            |                        | T=0       | T=8 week | T=4 month | 0-8 week   | 0-4 months |
| WT rHSA    | 0.6                    | 86 (100)  | 88 (100) | 87 (100)  | 2          | 1          |
| C34A+L24C  | 0.7                    | 94 (109)  | 96 (109) | 97 (112)  | 2          | 3          |
| C34A+F49C  | 0.5                    | 94 (109)  | 95 (108) | 94 (108)  | 1          | 0          |
| C34A+V54C  | 0.5                    | 93 (108)  | 94 (107) | 93 (107)  | 1          | 0          |
| C34A+D56C  | 0.3                    | 85 (99)   | 77 (88)  | 75 (86)   | -8         | -10        |
| C34A+L66C  | 0.2                    | 7 (8)     | 12 (14)  | 6 (7)     | 5          | -1         |
| C34A+A92C  | 0.9                    | 93 (108)  | 94 (107) | 94 (108)  | 1          | 1          |
| C34A+Q94C  | 0.1                    | 95 (111)  | 96 (109) | 95 (109)  | 1          | 0          |
| C34A+E97C  | 0.5                    | 88 (102)  | 85 (97)  | 85 (98)   | -3         | -3         |
| C34A+H128C | 0.6                    | 92 (107)  | 93 (106) | 93 (107)  | 1          | 1          |
| C34A+F156C | 1.0                    | 92 (107)  | 94 (107) | 94 (108)  | 2          | 2          |
| C34A+E227C | 0.5                    | 86 (100)  | 88 (100) | 88 (101)  | 2          | 2          |
| C34A+D237C | 0.5                    | 93 (108)  | 95 (108) | 94 (108)  | 2          | 1          |
| C34A+K240C | 0.6                    | 93 (108)  | 94 (107) | 94 (108)  | 1          | 1          |
| C34A+D259C | 0.5                    | 93 (108)  | 95 (108) | 94 (108)  | 2          | 1          |
| C34A+K262C | 0.6                    | 92 (107)  | 93 (106) | 93 (107)  | 1          | 1          |
| C34A+N267C | 0.6                    | 94 (109)  | 95 (108) | 95 (109)  | 1          | 1          |
| C34A+Q268C | 0.8                    | 95 (111)  | 96 (109) | 96 (110)  | 1          | 1          |
| C34A+L275C | 0.5                    | 94 (109)  | 95 (108) | 94 (108)  | 1          | 0          |
| C34A+E277C | 0.7                    | 65 (76)   | 60 (68)  | 59 (68)   | -5         | -6         |
| C34A+L284C | 0.7                    | 92 (107)  | 94 (107) | 94 (108)  | 2          | 2          |
| C34A+E311C | 0.7                    | 54 (63)   | 48 (55)  | 46 (53)   | -6         | -8         |
| C34A+K317C | 0.6                    | 83 (97)   | 82 (93)  | 82 (94)   | -1         | -1         |
| C34A+A322C | 0.8                    | 81 (94)   | 84 (96)  | 83 (95)   | 3          | 2          |
| C34A+E333C | 0.3                    | 94 (109)  | 97 (110) | 95 (109)  | 3          | 1          |
| C34A+D340C | 0.6                    | 93 (108)  | 94 (107) | 94 (108)  | 1          | 1          |
| C34A+E354C | 0.7                    | 89 (104)  | 90 (102) | 90 (103)  | 1          | 1          |
| C34A+K359C | 0.6                    | 86 (100)  | 87 (99)  | 87 (100)  | 1          | 1          |
| C34A+A362C | 0.6                    | 89 (104)  | 89 (101) | 88 (101)  | 0          | -1         |
| C34A+E382C | 0.6                    | 86 (100)  | 84 (96)  | 84 (97)   | -2         | -2         |

| <b>Sample</b> | <b>UHPLC conc.<br/>(mg/mL)</b> | <b>% Monomer</b> |                 |                  | <b>Δ% Monomer</b> |                   |
|---------------|--------------------------------|------------------|-----------------|------------------|-------------------|-------------------|
|               |                                | <b>T=0</b>       | <b>T=8 week</b> | <b>T=4 month</b> | <b>0-8 week</b>   | <b>0-4 months</b> |
| C34A+L398C    | 0.7                            | 90 (105)         | 92 (105)        | 87 (100)         | 2                 | -3                |



Supplementary Table 5. Conjugation efficiency of maleimide-PEG2-biotin (+525Da) to rHSA thiol variants presented as percentage of the conjugation measured by the weight increase by mass spectrometry.

| Sample Description | Reference MW Unconjugated (Da) | Theoretical Conjugate mass (Da) | Conjugate Intact Mass (Da) | % Conjugation |
|--------------------|--------------------------------|---------------------------------|----------------------------|---------------|
| WT control         | 66439                          | 66964                           | 66966                      | 93            |
| C34A+L24C          | 66397                          | 66922                           | 66924                      | 96            |
| C34A+F49C          | 66363                          | 66888                           | 66889                      | 84            |
| C34A+V54C          | 66411                          | 66936                           | 66938                      | 100           |
| C34A+D56C          | 66395                          | 66920                           | 66922                      | 79            |
| C34A+L66C          | 66397                          | 66922                           | 66400                      | 0             |
| C34A+A92C          | 66439                          | 66964                           | 66407                      | 0             |
| C34A+K93C          | 66382                          | 66907                           | 66908                      | 100           |
| C34A+Q94C          | 66382                          | 66907                           | 66409                      | 0             |
| C34A+E97C          | 66381                          | 66906                           | 66907                      | 9             |
| C34A+H128C         | 66373                          | 66898                           | 66899                      | 100           |
| C34A+F156C         | 66363                          | 66888                           | 66890                      | 76            |
| C34A+A226C         | 66439                          | 66964                           | 66440                      | 0             |
| C34A+E227C         | 66381                          | 66906                           | 66907                      | 95            |
| C34A+E230C         | 66381                          | 66906                           | 66908                      | 72            |
| C34A+D237C         | 66395                          | 66920                           | 66921                      | 73            |
| C34A+K240C         | 66382                          | 66907                           | 66908                      | 100           |
| C34A+D259C         | 66395                          | 66920                           | 67424                      | 0             |
| C34A+K262C         | 66382                          | 66907                           | 66908                      | 100           |
| C34A+N267C         | 66396                          | 66921                           | 66922                      | 47            |
| C34A+Q268C         | 66382                          | 66907                           | 66908                      | 92            |
| C34A+I271C         | 66397                          | 66922                           | 66924                      | 72            |
| C34A+L275C         | 66397                          | 66922                           | 66897                      | 0             |
| C34A+E277C         | 66381                          | 66906                           | 66908                      | 90            |
| C34A+L284C         | 66397                          | 66922                           | 67427                      | 0             |
| C34A+E294C         | 66381                          | 66906                           | 66909                      | >95           |
| C34A+E311C         | 66381                          | 66906                           | 66909                      | 76            |
| C34A+K317C         | 66382                          | 66907                           | 66909                      | 91            |
| C34A+A322C         | 66439                          | 66964                           | 66965                      | 94            |
| C34A+E333C         | 66381                          | 66906                           | 66907                      | 83            |
| C34A+D340C         | 66395                          | 66920                           | 66923                      | 12            |
| C34A+E354C         | 66381                          | 66906                           | 66908                      | 32            |
| C34A+E358C         | 66381                          | 66906                           | 66909                      | 100           |
| C34A+K359C         | 66382                          | 66907                           | 66908                      | 95            |
| C34A+A362C         | 66439                          | 66964                           | 66966                      | 94            |

*Engineered albumin with enhanced drug-carrier potential*

| <b>Sample Description</b> | <b>Reference MW Unconjugated (Da)</b> | <b>Theoretical Conjugate mass (Da)</b> | <b>Conjugate Intact Mass (Da)</b> | <b>% Conjugation</b> |
|---------------------------|---------------------------------------|----------------------------------------|-----------------------------------|----------------------|
| C34A+E382C                | 66381                                 | 66906                                  | 66909                             | 83                   |
| C34A+L398C                | 66397                                 | 66922                                  | 66925                             | 36                   |

Supplementary Table 6. Average  $K_D$  ( $\mu M$ ) of single-thiol rHSA variants for binding to mouse FcRn or human FcRn at pH 5.5 or 7.0. Biolayer interferometric measurements were done in triplicates using the Octet RED96 system (PALL/Fortebio). NB: No binding, PF: poor fit/low binding.

| Albumin | mFcRn              |                    | hFcRn              |                    |
|---------|--------------------|--------------------|--------------------|--------------------|
|         | pH 5.5 ( $\mu M$ ) | pH 7.0 ( $\mu M$ ) | pH 5.5 ( $\mu M$ ) | pH 7.0 ( $\mu M$ ) |
| WT      | 9.369              | NB                 | 0.443              | PF                 |
| HBI     | 1.045              | NB                 | 0.027              | 2616               |
| HBII    | 0.587              | NB                 | 0.008              | 446.4              |

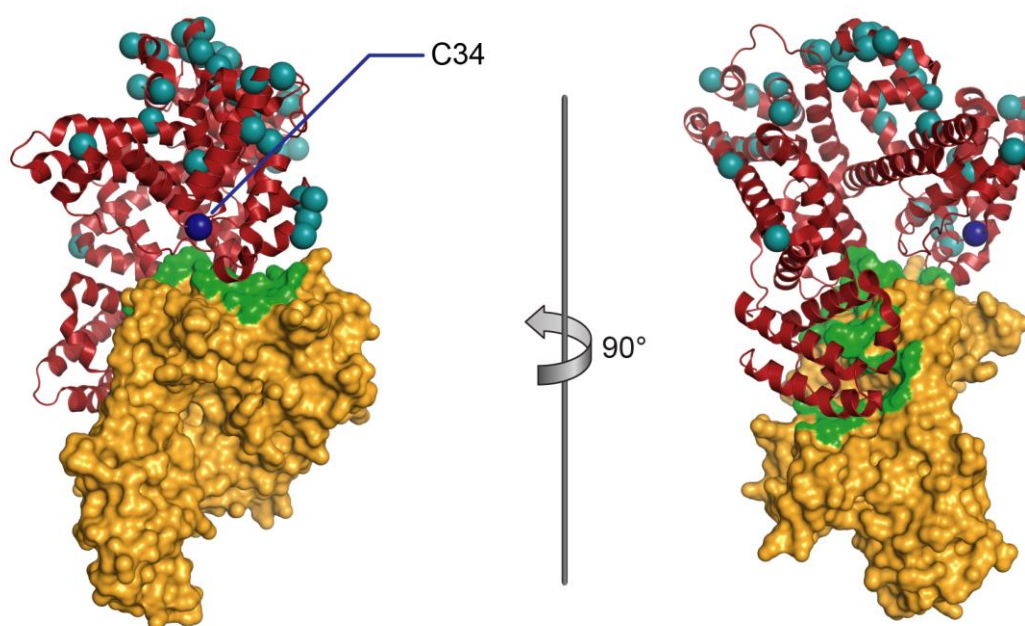

Supplementary Figure 1. Crystal structure of human serum albumin in complex with the FcRn receptor. The beta-2-microglobulin FcRn/complex is shown in gold and human serum albumin in red. The location of the natural occurring cysteine (Cys34) in dark blue and the positions were cysteines with reactive thiol groups have been inserted (detailed in supplementary table 2) are shown in teal. Interface residues within a distance of 5 Å from albumin are marked in green on the surface representation of FcRn receptor. Modified from pdb 4n0f.

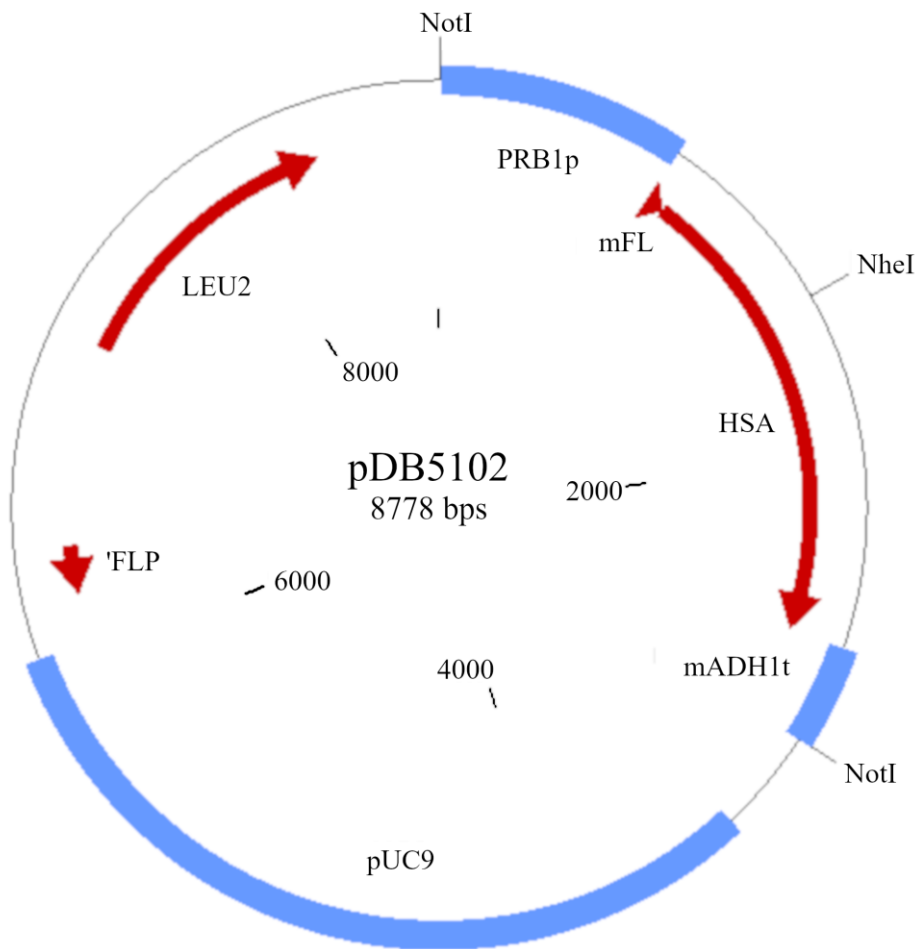

Supplementary Figure 2. Plasmid map of pDB5102. The map shows the main features of the DNA used to construct the albumin expression cassettes for the variant proteins.

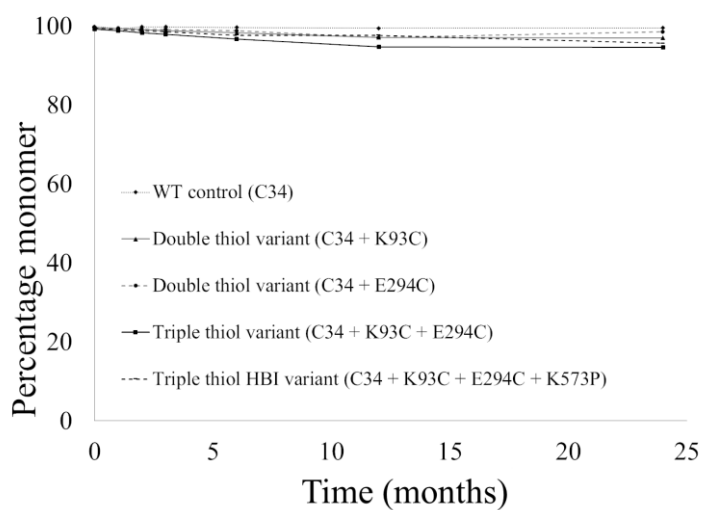

Supplementary Figure 3. Stability of thiol rHSA variants during long term storage at 5 °C, maintaining >95% monomer over 24 months.

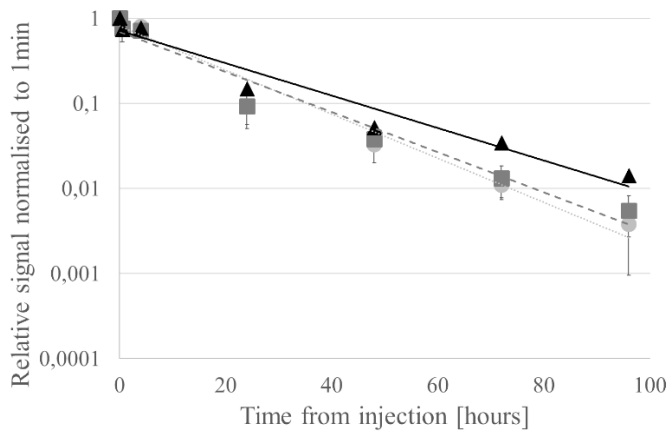

Supplementary Figure 4. Relative fluorescent signal in serum samples 1 min to 96 hours (entire period) after injection of triple-thiol rHSA variants bearing 3xAF680 (● NB, ■ WT, ▲ HBII, n=7) with fitted exponential curves.
